# Supplementary material
Source: MDPI journal article supplement (https://www.mdpi.com/2312-7481/8/9/109)
Supplement: s1 [file s1]

# Triggering of Valence Tautomeric Transitions in Dioxolene-Based Cobalt Complexes Influenced by Ligand Substituents, Co-ligands, and Anions

Sriram Sundaresan, Marcel Diehl, Luca M. Carrella and Eva Rentschler\*

Department Chemie, Johannes-Gutenberg-Universität Mainz, Duesbergweg 10–14, 55128 Mainz, Germany

\* Correspondence: rentschler@uni-mainz.de; Tel.: +49-6131-3925491

## Electronic Supplementary Information

### Contents

|                                                      |   |
|------------------------------------------------------|---|
| S1. $^1\text{H}$ -NMR Spectra:                       | 2 |
| S2. $^{13}\text{C}$ -NMR Spectra:                    | 5 |
| S3 Infrared Spectra:                                 | 7 |
| S4 Bond Length Tables and crystal structure at 173 K | 9 |

### S1. $^1\text{H}$ -NMR Spectra:

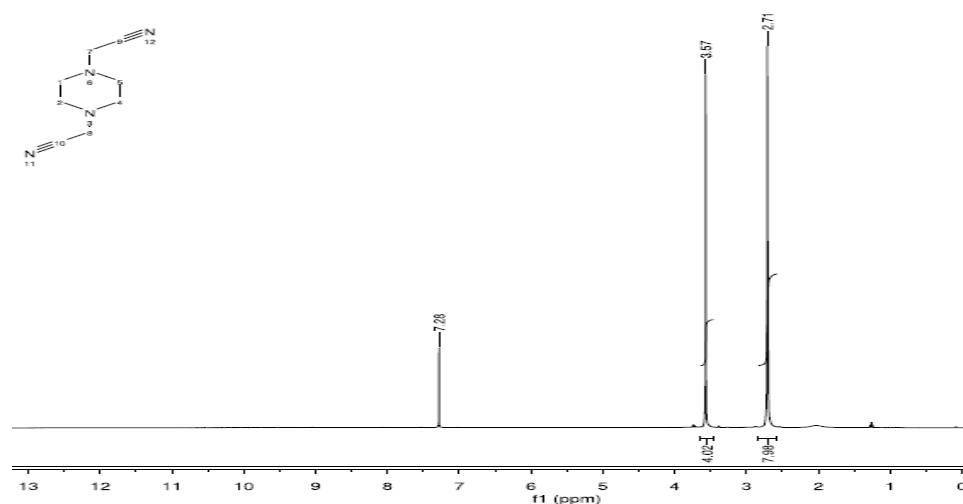

Figure S1.  $^1\text{H}$ -NMR spectra of N,N'-Bis(cyanomethyl)piperazine.

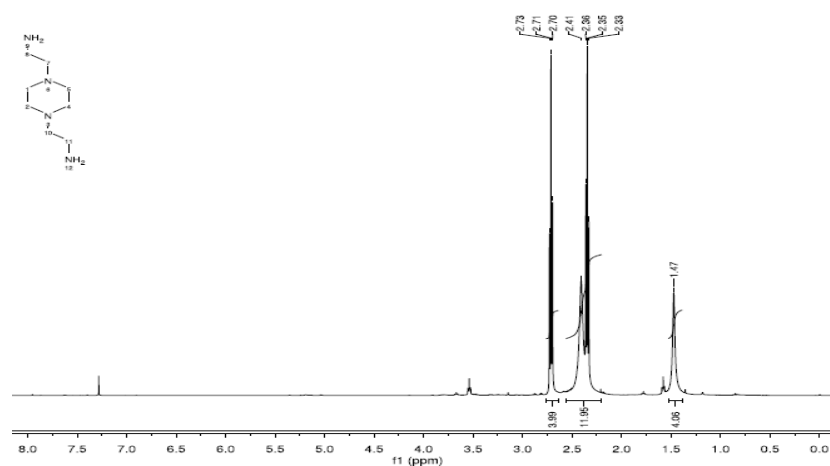

**Figure S2.**  $^1\text{H}$ -NMR spectra of N,N'-Bis(2-aminoethyl)piperazine.

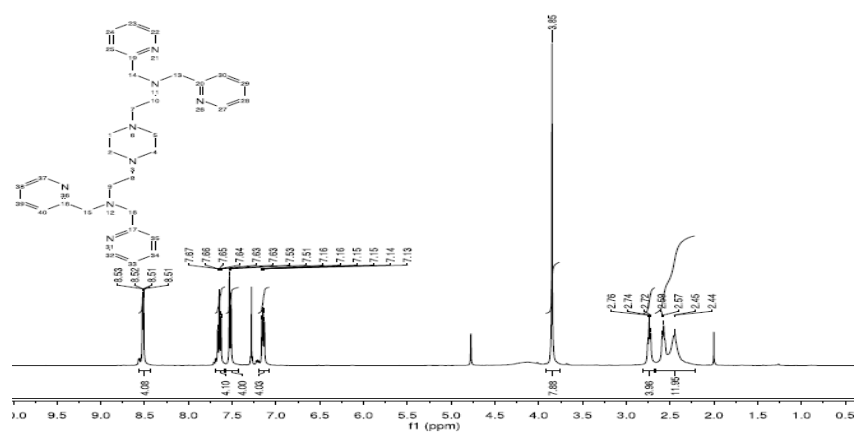

**Figure S3.**  $^1\text{H}$ -NMR spectra of 1,1'-(piperazine-1,4-diyl)bis(N,N-bis(pyridinylmethyl)methanamine) ( $\text{L}^{\text{tpap}}$ ) octadentate ligand.

## S2. $^{13}\text{C}$ -NMR Spectra:

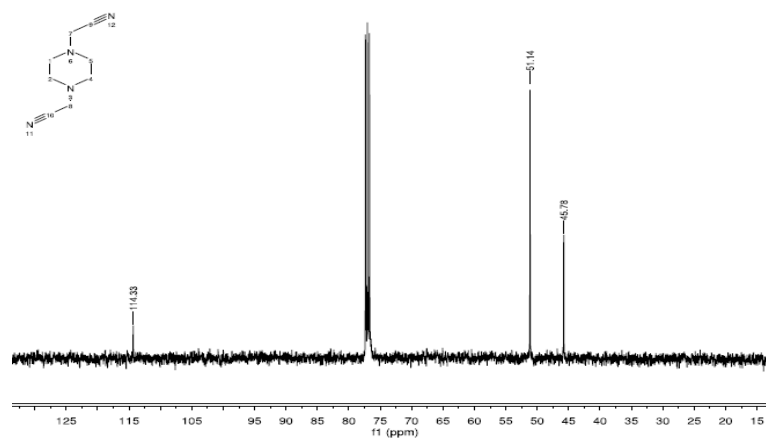

**Figure S4.**  $^{13}\text{C}$ -NMR spectra of N,N'-Bis(cyanomethyl)piperazine.

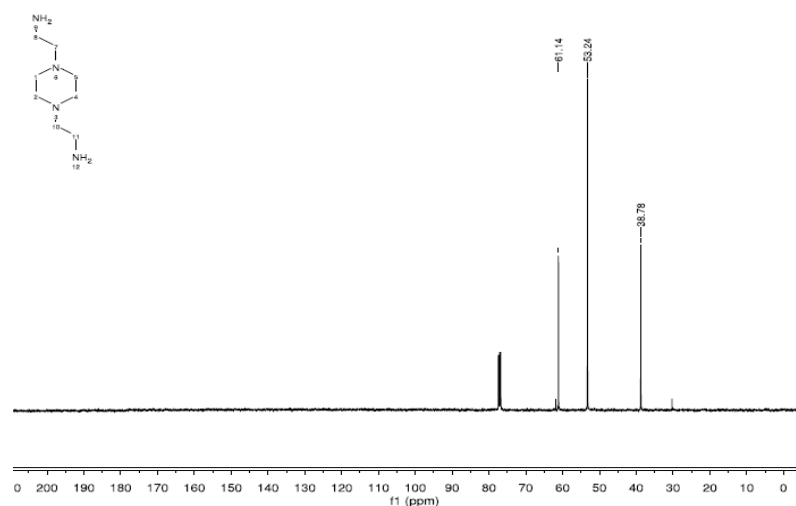

**Figure S5.**  $^{13}\text{C}$ -NMR spectra of  $N,N'$ -Bis(2-aminoethyl)piperazine.

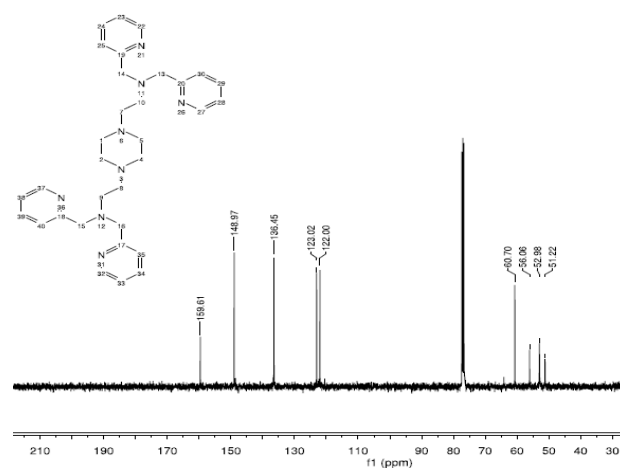

**Figure S6.**  $^{13}\text{C}$ -NMR spectra of  $N,N,N',N'$ -Tetra-2-picolyl-1,4-bis(2-aminoethyl)piperazine ( $\text{L}^{\text{tpbap}}$ ).

### S3 Infrared Spectra

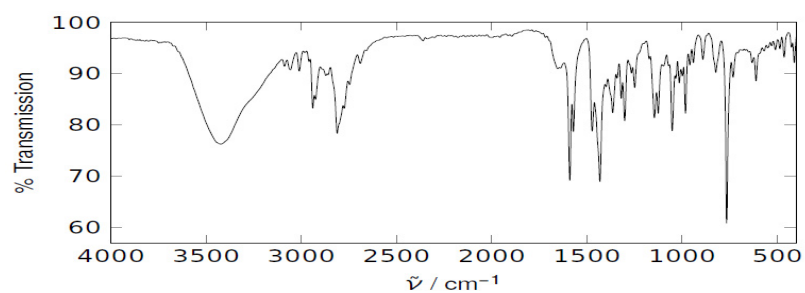

**Figure S7.** Infrared spectra of 1,1'-(piperazine-1,4-diyl)bis( $N,N$ bis(pyridinylmethyl)methanamine)( $\text{L}^{\text{tpbap}}$ ) octadentate ligand.

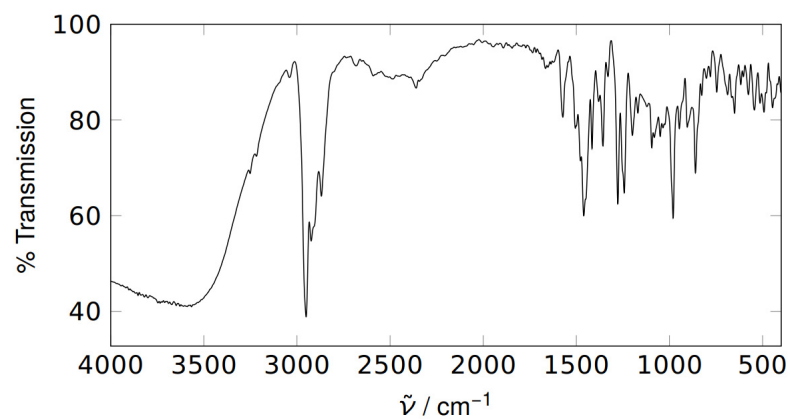

**Figure S8.** Infrared spectra of ligand  $[\text{Co}(\text{3,5-dbsq})(\text{3,5-dbcac})_2(\text{4-Mepip})_2]$  (**1**).

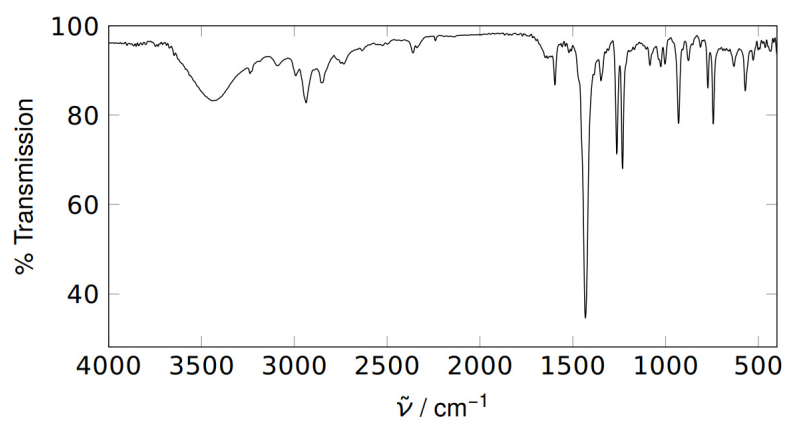

**Figure S9.** Infrared spectra of ligand  $[\text{Co}(\text{tbcac})_2(\text{pip})_2] \text{CH}_3\text{CN}$  (**2**).

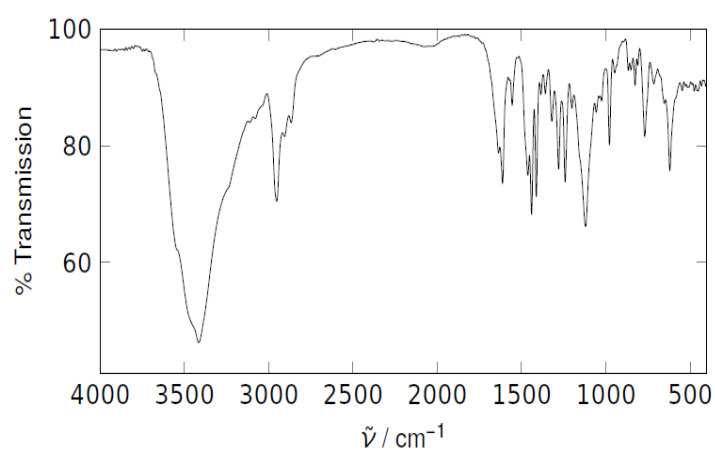

**Figure S10.** Infrared spectra of ligand  $[\text{Co}_2(\text{Ltpbap})(\text{3,5-dbcac})_2](\text{SO}_4) \cdot 5.5\text{MeOH} \cdot 2\text{H}_2\text{O}$  (**3a**).

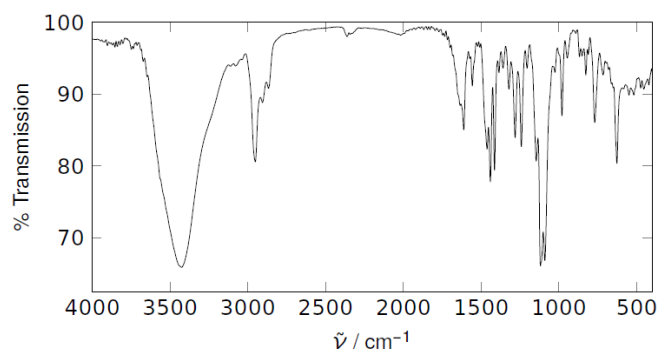

**Figure S11.** Infrared spectra of ligand  $[\text{Co}_2 (\text{L}^{\text{tpbap}})(3,5\text{-dbcac})_2 ](\text{ClO}_4)_2 \cdot 1.5 \text{H}_2\text{O}$  (**3b**).

#### S4 Bond Length Tables and Crystal Structure at 173 K

**Table S1.** Selected bond length for complex 1 at 173 K.

| Bond    | Bond length (Å) |
|---------|-----------------|
| O1-C1   | 1.302(15)       |
| O2-C2   | 1.312(14)       |
| O3-C15  | 1.348(15)       |
| O4-C16  | 1.362(14)       |
| C1-C2   | 1.470(16)       |
| C2-C3   | 1.393(16)       |
| C3-C4   | 1.399(16)       |
| C4-C5   | 1.413(15)       |
| C5-C6   | 1.372(17)       |
| C6-C1   | 1.409(19)       |
| C15-C16 | 1.423(16)       |
| C16-C17 | 1.404(15)       |
| C17-C18 | 1.407(16)       |
| C18-C19 | 1.391(15)       |
| C19-C20 | 1.388(17)       |
| C20-C15 | 1.369(19)       |

**Table S2.** Selected bond length for complex 2 at 173 K.

| Bond    | Bond length (Å) |
|---------|-----------------|
| O1-C1   | 1.333(5)        |
| O2-C2   | 1.318(5)        |
| O3-C7   | 1.334(5)        |
| O4-C8   | 1.315(5)        |
| C1-C2   | 1.445(6)        |
| C2-C3   | 1.385(6)        |
| C3-C4   | 1.413(6)        |
| C4-C5   | 1.396(6)        |
| C5-C6   | 1.394(6)        |
| C6-C1   | 1.397(6)        |
| C7-C8   | 1.417(6)        |
| C8-C9   | 1.412(6)        |
| C9-C10  | 1.403(7)        |
| C10-C11 | 1.391(7)        |

|         |           |
|---------|-----------|
| C11-C12 | 1.410 (7) |
| C12-C7  | 1.378(6)  |

**Table S3.** Bond valence sum values (BVS) are calculated from literature known formula  $z_j = \sum S_{ij}$  tabulated extracted and calculated from the X-ray data obtained at 173 K for the Co ions in complex **1**, **2**, **3a** and **3b**.

| Complex           | Oxidation state 2+ (HS) | Oxidation state 3+ (LS) |
|-------------------|-------------------------|-------------------------|
| Complex <b>1</b>  | 3.2841                  | 2.9287                  |
| Complex <b>2</b>  | 3.1199                  | 2.7796                  |
| Complex <b>3a</b> | 3.2307                  | 2.9278                  |
| Complex <b>3b</b> | 3.2407                  | 2.9377                  |

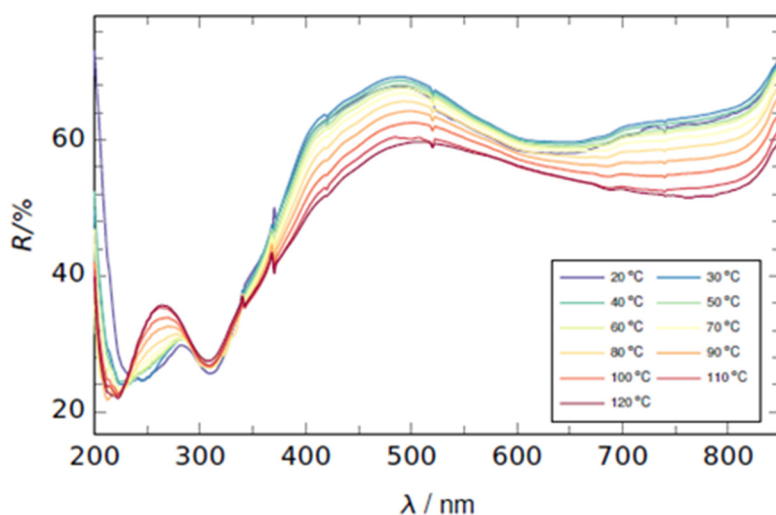

**Figure S12.** Solid state reflectance spectra for complex **1**. The temperature dependence of the reflectance shows a VT- transition between 20 °C and 120 °C.

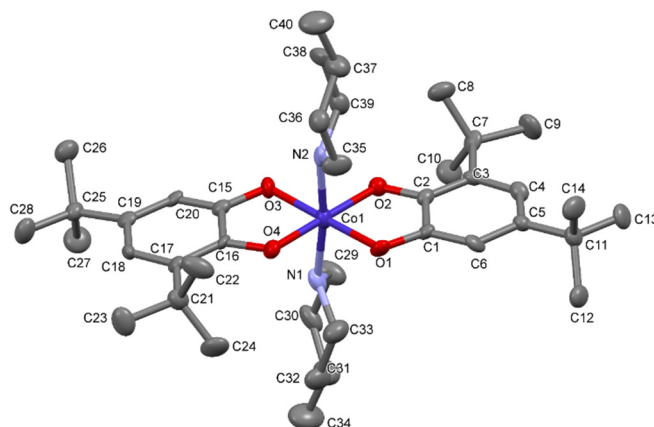

**Figure S13.** Complex structure of **1** at 173 K with atom labels. Thermal displacement probability set to 50%; hydrogen atoms are omitted for clarity.

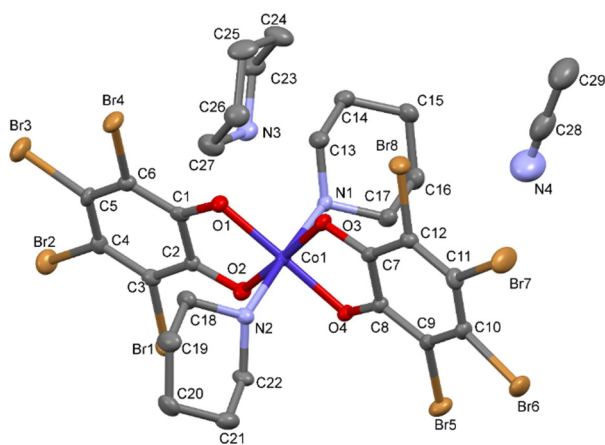

**Figure S14:** Complex structure of **2** at 173 K with atom labels. Thermal displacement probability set to 50%; hydrogen atoms are omitted for clarity.
